# Supplementary material
Source: PubMed Central journal article supplement (PMC6109602)
Supplement: NIHMS982628-supplement-Supplemental_Data.pdf [file NIHMS982628-supplement-Supplemental_Data.pdf]

# Supplemental Information

**SUPPLEMENTAL TABLE 5** Prevalence of Overweight and Obesity From 1999 to 2016 by Age for Both Sexes

|                       | Overweight |      |              | Class I Obesity |              | Class II Obesity |             | Class III Obesity |             |
|-----------------------|------------|------|--------------|-----------------|--------------|------------------|-------------|-------------------|-------------|
|                       | <i>n</i>   | %    | 95% CI       | %               | 95% CI       | %                | 95% CI      | %                 | 95% CI      |
| <b>All ages</b>       |            |      |              |                 |              |                  |             |                   |             |
| 1999–2000             | 4063       | 28.8 | 26.0 to 31.7 | 14.6            | 12.8 to 16.4 | 4.0              | 3.0 to 5.1  | 0.9               | 0.6 to 1.3  |
| 2001–2002             | 4305       | 29.9 | 27.3 to 32.5 | 15.2            | 13.3 to 17.2 | 5.4              | 4.2 to 6.6  | 1.2               | 0.9 to 1.6  |
| 2003–2004             | 4016       | 33.8 | 30.3 to 37.3 | 17.1            | 14.7 to 19.6 | 5.2              | 4.0 to 6.5  | 1.6               | 1.0 to 2.2  |
| 2005–2006             | 4252       | 30.1 | 26.9 to 33.3 | 15.8            | 13.1 to 18.4 | 5.1              | 3.7 to 6.4  | 1.3               | 0.7 to 1.8  |
| 2007–2008             | 3281       | 31.7 | 29.4 to 34.0 | 17.0            | 14.4 to 19.6 | 5.1              | 3.8 to 6.3  | 1.6               | 1.1 to 2.2  |
| 2009–2010             | 3408       | 31.9 | 30.0 to 33.8 | 17.0            | 15.7 to 18.4 | 5.8              | 4.6 to 7.1  | 1.6               | 1.1 to 2.2  |
| 2011–2012             | 3355       | 32.0 | 29.4 to 34.6 | 16.9            | 15.0 to 18.9 | 5.8              | 4.4 to 7.2  | 2.1               | 1.5 to 2.7  |
| 2013–2014             | 3523       | 33.5 | 31.2 to 35.8 | 17.3            | 15.2 to 19.4 | 6.2              | 5.2 to 7.3  | 2.3               | 1.7 to 2.9  |
| 2015–2016             | 3340       | 35.1 | 32.1 to 38.1 | 18.5            | 16.0 to 21.0 | 6.0              | 4.4 to 7.5  | 1.9               | 1.1 to 2.8  |
| <i>p</i> <sup>a</sup> |            | .387 |              | .481            |              | .790             |             | .477              |             |
| <i>p</i> <sup>b</sup> |            | .003 |              | .008            |              | .019             |             | <.001             |             |
| <b>Age 2–5</b>        |            |      |              |                 |              |                  |             |                   |             |
| 1999–2000             | 726        | 21.2 | 17.7 to 24.8 | 10.7            | 7.5 to 14.0  | 1.8              | 0.5 to 3.1  | 0.2               | –0.1 to 0.5 |
| 2001–2002             | 795        | 22.4 | 17.8 to 27.0 | 10.1            | 6.7 to 13.6  | 2.6              | 0.6 to 4.7  | 0.6               | –0.2 to 1.4 |
| 2003–2004             | 819        | 25.9 | 21.7 to 30.2 | 13.4            | 10.3 to 16.4 | 2.8              | 1.4 to 4.2  | 0.7               | –0.1 to 1.5 |
| 2005–2006             | 952        | 22.3 | 18.0 to 26.6 | 10.7            | 8.5 to 12.9  | 1.5              | 0.6 to 2.5  | 0.3               | –0.1 to 0.7 |
| 2007–2008             | 885        | 20.9 | 17.2 to 24.5 | 10.3            | 7.7 to 12.8  | 1.7              | 0.4 to 3.0  | 0.8               | –0.2 to 1.8 |
| 2009–2010             | 903        | 26.4 | 22.4 to 30.5 | 12.1            | 9.8 to 14.3  | 2.6              | 1.5 to 3.7  | 0.3               | 0.0 to 0.6  |
| 2011–2012             | 871        | 22.6 | 18.5 to 26.8 | 8.3             | 5.6 to 11.0  | 1.6              | 0.6 to 2.7  | 0.5               | 0.1 to 0.9  |
| 2013–2014             | 843        | 25.1 | 21.1 to 29.2 | 9.3             | 6.7 to 11.9  | 1.7              | 0.6 to 2.8  | 0.2               | –0.1 to 0.4 |
| 2015–2016             | 814        | 26.0 | 21.7 to 30.3 | 13.7            | 11.5 to 15.8 | 1.8              | 0.7 to 2.9  | 0.2               | –0.1 to 0.4 |
| <i>p</i> <sup>a</sup> |            | .773 |              | .011            |              | .928             |             | .962              |             |
| <i>p</i> <sup>b</sup> |            | .131 |              | .992            |              | .420             |             | .294              |             |
| <b>Age 6–8</b>        |            |      |              |                 |              |                  |             |                   |             |
| 1999–2000             | 534        | 29.7 | 24.2 to 35.2 | 14.9            | 11.6 to 18.3 | 3.1              | 0.9 to 5.3  | 0.4               | 0.0 to 0.8  |
| 2001–2002             | 596        | 30.8 | 24.2 to 37.3 | 15.1            | 11.4 to 18.9 | 6.3              | 3.6 to 9.0  | 1.2               | 0.1 to 2.4  |
| 2003–2004             | 490        | 30.0 | 25.4 to 34.6 | 15.8            | 12.7 to 18.8 | 3.8              | 1.8 to 5.7  | 1.4               | 0.2 to 2.6  |
| 2005–2006             | 553        | 25.3 | 18.4 to 32.2 | 13.1            | 8.4 to 17.9  | 2.8              | 1.5 to 4.1  | 0.8               | 0.3 to 1.4  |
| 2007–2008             | 608        | 31.4 | 28.0 to 34.8 | 17.3            | 14.1 to 20.5 | 5.1              | 2.9 to 7.2  | 1.1               | 0.2 to 2.1  |
| 2009–2010             | 597        | 30.8 | 28.5 to 33.1 | 17.6            | 15.2 to 19.9 | 4.3              | 2.8 to 5.8  | 1.1               | 0.1 to 2.1  |
| 2011–2012             | 654        | 30.8 | 25.3 to 36.3 | 16.9            | 13.3 to 20.4 | 6.0              | 4.4 to 7.7  | 2.5               | 1.2 to 3.7  |
| 2013–2014             | 674        | 30.5 | 26.3 to 34.7 | 15.7            | 12.2 to 19.2 | 3.2              | 1.9 to 4.6  | 0.5               | 0.0 to 0.9  |
| 2015–2016             | 655        | 32.8 | 27.5 to 38.1 | 18.8            | 13.5 to 24.1 | 5.1              | 3.3 to 7.0  | 1.4               | 0.6 to 2.2  |
| <i>p</i> <sup>a</sup> |            | .503 |              | .344            |              | .101             |             | .055              |             |
| <i>p</i> <sup>b</sup> |            | .379 |              | .135            |              | .555             |             | .206              |             |
| <b>Age 9–11</b>       |            |      |              |                 |              |                  |             |                   |             |
| 1999–2000             | 514        | 31.7 | 24.7 to 38.7 | 16.4            | 12.3 to 20.5 | 3.8              | 1.6 to 6.1  | 0.6               | –0.1 to 1.3 |
| 2001–2002             | 569        | 33.5 | 28.6 to 38.3 | 17.0            | 12.7 to 21.2 | 5.9              | 4.1 to 7.7  | 1.4               | 0.4 to 2.4  |
| 2003–2004             | 492        | 44.8 | 38.8 to 50.9 | 22.1            | 16.4 to 27.7 | 6.9              | 5.5 to 8.3  | 1.5               | 0.8 to 2.2  |
| 2005–2006             | 561        | 33.5 | 26.7 to 40.4 | 18.2            | 14.2 to 22.3 | 5.4              | 3.4 to 7.4  | 0.5               | 0.2 to 0.8  |
| 2007–2008             | 589        | 39.7 | 35.2 to 44.1 | 22.1            | 18.5 to 25.7 | 6.5              | 5.0 to 7.9  | 0.9               | 0.3 to 1.5  |
| 2009–2010             | 616        | 35.1 | 31.4 to 38.7 | 18.7            | 15.8 to 21.7 | 5.8              | 3.6 to 8.1  | 1.7               | 0.8 to 2.7  |
| 2011–2012             | 614        | 38.0 | 33.2 to 42.8 | 18.7            | 14.0 to 23.3 | 7.7              | 5.1 to 10.4 | 1.4               | 0.4 to 2.5  |
| 2013–2014             | 620        | 36.1 | 30.4 to 41.8 | 20.2            | 15.4 to 25.0 | 5.9              | 3.5 to 8.2  | 1.8               | 0.6 to 3.0  |
| 2015–2016             | 613        | 35.6 | 31.0 to 40.2 | 18.5            | 15.1 to 22.0 | 5.3              | 3.1 to 7.5  | 1.0               | 0.5 to 1.6  |
| <i>p</i> <sup>a</sup> |            | .895 |              | .574            |              | .738             |             | .269              |             |
| <i>p</i> <sup>b</sup> |            | .654 |              | .493            |              | .410             |             | .240              |             |
| <b>Age 12–15</b>      |            |      |              |                 |              |                  |             |                   |             |
| 1999–2000             | 1184       | 31.8 | 28.8 to 34.7 | 16.6            | 14.8 to 18.3 | 5.4              | 3.8 to 6.9  | 1.4               | 0.6 to 2.2  |
| 2001–2002             | 1191       | 31.4 | 26.0 to 36.8 | 16.8            | 13.4 to 20.2 | 5.8              | 3.8 to 7.7  | 0.8               | 0.4 to 1.3  |
| 2003–2004             | 1096       | 35.7 | 28.7 to 42.7 | 16.8            | 12.6 to 21.0 | 5.3              | 3.6 to 7.0  | 1.5               | 0.7 to 2.2  |
| 2005–2006             | 1058       | 34.6 | 30.2 to 39.1 | 18.1            | 12.6 to 23.5 | 6.8              | 3.9 to 9.8  | 1.3               | 0.7 to 1.9  |
| 2007–2008             | 608        | 37.9 | 33.7 to 42.1 | 19.5            | 15.0 to 24.0 | 6.2              | 4.2 to 8.1  | 2.3               | 1.2 to 3.3  |
| 2009–2010             | 645        | 33.4 | 29.3 to 37.5 | 17.4            | 14.3 to 20.6 | 7.3              | 4.1 to 10.5 | 1.9               | 0.5 to 3.4  |
| 2011–2012             | 623        | 36.7 | 30.4 to 42.9 | 23.3            | 18.8 to 27.8 | 7.2              | 3.4 to 11.0 | 2.5               | 0.7 to 4.3  |
| 2013–2014             | 718        | 38.2 | 33.2 to 43.2 | 20.1            | 15.5 to 24.7 | 6.8              | 4.8 to 8.8  | 3.0               | 1.6 to 4.3  |
| 2015–2016             | 675        | 38.7 | 33.1 to 44.2 | 20.6            | 15.9 to 25.2 | 7.5              | 4.5 to 10.6 | 2.2               | 1.0 to 3.3  |
| <i>p</i> <sup>a</sup> |            | .906 |              | .889            |              | .686             |             | .386              |             |
| <i>p</i> <sup>b</sup> |            | .018 |              | .014            |              | .100             |             | .004              |             |
| <b>Age 16–19</b>      |            |      |              |                 |              |                  |             |                   |             |

TABLE 5 Continued

|                       | <i>n</i> | Overweight |              | Class I Obesity |              | Class II Obesity |             | Class III Obesity |            |
|-----------------------|----------|------------|--------------|-----------------|--------------|------------------|-------------|-------------------|------------|
|                       |          | %          | 95% CI       | %               | 95% CI       | %                | 95% CI      | %                 | 95% CI     |
| 1999–2000             | 1105     | 30.4       | 26.2 to 34.7 | 15.0            | 11.8 to 18.2 | 5.8              | 3.7 to 8.0  | 1.9               | 1.0 to 2.8 |
| 2001–2002             | 1154     | 31.0       | 28.2 to 33.8 | 16.5            | 13.6 to 19.5 | 6.1              | 3.9 to 8.2  | 2.1               | 1.3 to 2.9 |
| 2003–2004             | 1119     | 33.8       | 29.7 to 37.8 | 18.3            | 14.5 to 22.1 | 7.3              | 4.4 to 10.3 | 2.8               | 0.9 to 4.7 |
| 2005–2006             | 1128     | 33.6       | 29.1 to 38.0 | 18.0            | 13.3 to 22.8 | 7.8              | 4.8 to 8.8  | 2.9               | 1.2 to 4.6 |
| 2007–2008             | 591      | 30.8       | 25.5 to 36.0 | 17.1            | 11.9 to 22.2 | 6.4              | 3.4 to 9.3  | 2.6               | 1.2 to 4.1 |
| 2009–2010             | 647      | 34.3       | 30.9 to 37.7 | 20.0            | 16.2 to 23.8 | 8.7              | 5.5 to 11.9 | 3.0               | 1.3 to 4.6 |
| 2011–2012             | 593      | 32.8       | 25.2 to 40.3 | 17.6            | 11.5 to 23.8 | 7.0              | 4.0 to 10.0 | 3.7               | 1.3 to 6.1 |
| 2013–2014             | 668      | 36.7       | 30.7 to 42.8 | 21.2            | 16.0 to 26.4 | 12.4             | 9.2 to 15.7 | 5.4               | 3.5 to 7.4 |
| 2015–2016             | 583      | 41.5       | 37.4 to 45.6 | 20.5            | 15.9 to 25.1 | 9.5              | 6.1 to 12.8 | 4.5               | 1.9 to 7.2 |
| <i>p</i> <sup>a</sup> |          | .200       |              | .845            |              | .210             |             | .594              |            |
| <i>p</i> <sup>b</sup> |          | .001       |              | .031            |              | .003             |             | .002              |            |

<sup>a</sup> *P* value from an adjusted Wald test comparing the 2013–2014 cycle to the 2015–2016 cycle.

<sup>b</sup> *P* value from the linear trend across 1999–2016.

**SUPPLEMENTAL TABLE 6** Prevalence of Overweight and Obesity From 1999 to 2016 by Age for Females

|                       | Overweight |      |              | Class I Obesity |              | Class II Obesity |             | Class III Obesity |             |
|-----------------------|------------|------|--------------|-----------------|--------------|------------------|-------------|-------------------|-------------|
|                       | <i>n</i>   | %    | 95% CI       | %               | 95% CI       | %                | 95% CI      | %                 | 95% CI      |
| <b>All ages</b>       |            |      |              |                 |              |                  |             |                   |             |
| 1999–2000             | 1992       | 27.5 | 25.4 to 29.7 | 14.6            | 12.2 to 16.9 | 4.0              | 2.8 to 5.1  | 0.9               | 0.6 to 1.2  |
| 2001–2002             | 2179       | 29.5 | 25.9 to 33.0 | 14.2            | 11.5 to 16.9 | 4.6              | 3.3 to 5.9  | 1.0               | 0.5 to 1.4  |
| 2003–2004             | 2012       | 32.9 | 29.0 to 36.8 | 16.1            | 13.3 to 18.9 | 5.1              | 3.5 to 6.7  | 1.6               | 0.6 to 2.5  |
| 2005–2006             | 2138       | 29.7 | 26.3 to 33.0 | 15.3            | 12.3 to 18.2 | 5.0              | 3.6 to 6.4  | 1.2               | 0.3 to 2.0  |
| 2007–2008             | 1556       | 31.2 | 28.0 to 34.5 | 15.9            | 12.9 to 18.9 | 4.6              | 3.2 to 6.0  | 1.6               | 0.5 to 2.6  |
| 2009–2010             | 1631       | 30.4 | 28.5 to 32.4 | 15.0            | 13.4 to 16.6 | 5.1              | 3.8 to 6.5  | 1.5               | 0.9 to 2.2  |
| 2011–2012             | 1642       | 31.7 | 27.4 to 36.1 | 17.2            | 14.8 to 19.6 | 5.9              | 4.3 to 7.6  | 2.2               | 1.4 to 3.1  |
| 2013–2014             | 1729       | 33.3 | 29.3 to 37.2 | 17.2            | 14.0 to 20.4 | 6.7              | 5.0 to 8.4  | 2.5               | 1.7 to 3.4  |
| 2015–2016             | 1644       | 35.5 | 31.9 to 39.2 | 17.8            | 15.5 to 20.2 | 5.2              | 3.5 to 7.0  | 1.8               | 0.9 to 2.8  |
| <i>P</i> <sup>a</sup> |            | .405 |              | .759            |              | .236             |             | .275              |             |
| <i>P</i> <sup>b</sup> |            | .003 |              | .020            |              | .028             |             | .001              |             |
| <b>Age 2–5</b>        |            |      |              |                 |              |                  |             |                   |             |
| 1999–2000             | 352        | 20.4 | 16.0 to 24.8 | 11.1            | 6.4 to 15.8  | 2.2              | 0.0 to 4.5  | 0.0               |             |
| 2001–2002             | 412        | 21.7 | 16.3 to 27.0 | 9.9             | 6.5 to 13.3  | 2.5              | 0.2 to 4.7  | 0.3               | –0.2 to 0.7 |
| 2003–2004             | 417        | 25.5 | 20.0 to 31.0 | 12.1            | 7.0 to 17.1  | 1.7              | 0.1 to 3.4  | 0.1               | –0.1 to 0.4 |
| 2005–2006             | 479        | 21.1 | 17.1 to 25.1 | 11.0            | 8.7 to 13.4  | 1.4              | 0.0 to 2.9  | 0.2               | –0.2 to 0.7 |
| 2007–2008             | 396        | 21.1 | 16.9 to 25.3 | 10.7            | 6.6 to 14.8  | 2.0              | –0.6 to 4.6 | 1.2               | –0.8 to 3.3 |
| 2009–2010             | 432        | 23.2 | 18.4 to 28.1 | 9.6             | 6.3 to 12.9  | 1.5              | 0.1 to 3.0  | 0.3               | –0.1 to 0.8 |
| 2011–2012             | 432        | 21.6 | 14.0 to 29.3 | 7.2             | 3.0 to 11.3  | 1.5              | 0.0 to 2.9  | 0.4               | –0.2 to 0.9 |
| 2013–2014             | 415        | 24.8 | 19.1 to 30.5 | 10.0            | 7.4 to 12.6  | 2.7              | 0.6 to 4.9  | 0.1               | –0.1 to 0.4 |
| 2015–2016             | 396        | 25.9 | 20.6 to 31.3 | 13.2            | 9.9 to 16.5  | 1.5              | 0.2 to 2.8  | 0.0               |             |
| <i>P</i> <sup>a</sup> |            | .769 |              | .140            |              | .326             |             | .323              |             |
| <i>P</i> <sup>b</sup> |            | .229 |              | .851            |              | .750             |             | .933              |             |
| <b>Age 6–8</b>        |            |      |              |                 |              |                  |             |                   |             |
| 1999–2000             | 241        | 25.6 | 18.4 to 32.8 | 14.0            | 8.9 to 19.0  | 2.9              | 0.4 to 5.5  | 0.4               | –0.1 to 1.0 |
| 2001–2002             | 309        | 27.9 | 19.8 to 36.0 | 12.0            | 5.9 to 18.1  | 4.0              | 0.8 to 7.3  | 0.6               | –0.6 to 1.8 |
| 2003–2004             | 261        | 26.7 | 18.7 to 34.7 | 13.6            | 7.0 to 20.2  | 4.3              | 1.7 to 6.8  | 1.4               | 0.0 to 2.7  |
| 2005–2006             | 274        | 22.4 | 13.8 to 30.9 | 12.6            | 5.9 to 19.2  | 2.0              | 0.4 to 3.6  | 0.4               | –0.2 to 1.0 |
| 2007–2008             | 305        | 29.9 | 24.3 to 35.4 | 14.1            | 10.1 to 18.1 | 3.7              | 0.9 to 6.4  | 0.9               | –0.1 to 1.9 |
| 2009–2010             | 282        | 32.7 | 27.2 to 38.3 | 17.5            | 12.7 to 22.3 | 4.2              | 1.7 to 6.7  | 1.1               | –0.4 to 2.7 |
| 2011–2012             | 304        | 32.4 | 25.6 to 39.1 | 19.9            | 15.1 to 24.6 | 5.4              | 3.2 to 7.6  | 1.8               | 0.7 to 2.8  |
| 2013–2014             | 320        | 29.4 | 21.8 to 36.9 | 13.3            | 9.3 to 17.4  | 3.2              | 1.0 to 5.5  | 0.4               | –0.2 to 1.0 |
| 2015–2016             | 321        | 34.2 | 27.0 to 41.4 | 19.4            | 13.1 to 25.8 | 5.0              | 2.4 to 7.5  | 1.8               | 0.7 to 2.8  |
| <i>P</i> <sup>a</sup> |            | .364 |              | .110            |              | .312             |             | .024              |             |
| <i>P</i> <sup>b</sup> |            | .041 |              | .050            |              | .339             |             | .091              |             |
| <b>Age 9–11</b>       |            |      |              |                 |              |                  |             |                   |             |
| 1999–2000             | 265        | 30.5 | 23.1 to 38.0 | 16.4            | 10.2 to 22.6 | 4.2              | 1.0 to 7.3  | 0.5               | –0.1 to 1.1 |
| 2001–2002             | 275        | 36.5 | 28.8 to 44.2 | 17.8            | 12.6 to 23.1 | 4.4              | 1.3 to 7.5  | 0.6               | 0.0 to 1.2  |
| 2003–2004             | 258        | 49.6 | 43.7 to 55.6 | 22.1            | 14.6 to 29.5 | 6.6              | 2.9 to 10.3 | 1.3               | 0.5 to 2.1  |
| 2005–2006             | 290        | 32.4 | 23.3 to 41.6 | 16.8            | 12.0 to 21.6 | 5.8              | 2.8 to 8.9  | 0.2               | –0.2 to 0.6 |
| 2007–2008             | 297        | 40.2 | 31.4 to 49.1 | 21.8            | 16.3 to 27.3 | 6.6              | 4.4 to 8.9  | 0.5               | –0.1 to 1.1 |
| 2009–2010             | 310        | 31.8 | 26.2 to 37.4 | 14.3            | 10.3 to 18.2 | 4.5              | 1.8 to 7.2  | 2.4               | 0.3 to 4.5  |
| 2011–2012             | 314        | 38.1 | 29.4 to 46.8 | 18.6            | 13.8 to 23.3 | 7.4              | 5.2 to 9.6  | 1.5               | –0.2 to 3.2 |
| 2013–2014             | 309        | 35.1 | 28.3 to 41.8 | 18.9            | 14.2 to 23.7 | 5.8              | 3.1 to 8.5  | 1.4               | 0.4 to 2.4  |
| 2015–2016             | 320        | 27.8 | 22.0 to 33.7 | 14.0            | 9.3 to 18.6  | 5.4              | 1.7 to 9.1  | 0.9               | 0.3 to 1.5  |
| <i>P</i> <sup>a</sup> |            | .110 |              | .141            |              | .852             |             | .396              |             |
| <i>P</i> <sup>b</sup> |            | .138 |              | .420            |              | .464             |             | .059              |             |
| <b>Age 12–15</b>      |            |      |              |                 |              |                  |             |                   |             |
| 1999–2000             | 591        | 33.0 | 28.1 to 37.8 | 16.4            | 13.4 to 19.4 | 5.3              | 4.0 to 6.7  | 1.2               | 0.1 to 2.3  |
| 2001–2002             | 639        | 32.3 | 27.4 to 37.2 | 16.9            | 12.4 to 21.4 | 5.3              | 2.7 to 8.0  | 1.0               | 0.2 to 1.8  |
| 2003–2004             | 534        | 34.0 | 26.0 to 42.1 | 16.2            | 10.2 to 22.1 | 5.0              | 2.7 to 7.3  | 0.7               | 0.2 to 1.1  |
| 2005–2006             | 531        | 37.0 | 32.0 to 41.9 | 19.6            | 13.3 to 25.9 | 7.5              | 4.4 to 10.6 | 1.1               | 0.5 to 1.7  |
| 2007–2008             | 290        | 39.7 | 33.8 to 45.6 | 18.2            | 13.1 to 23.3 | 5.9              | 3.5 to 8.4  | 2.6               | 0.6 to 4.6  |
| 2009–2010             | 321        | 32.9 | 25.0 to 40.8 | 16.4            | 12.7 to 20.1 | 5.4              | 2.6 to 8.1  | 0.7               | 0.0 to 1.4  |
| 2011–2012             | 300        | 35.0 | 27.8 to 42.3 | 23.6            | 17.9 to 29.4 | 7.9              | 2.8 to 13.0 | 3.1               | 0.3 to 5.9  |
| 2013–2014             | 345        | 40.4 | 28.8 to 52.0 | 22.1            | 12.4 to 31.8 | 5.7              | 2.2 to 9.3  | 2.5               | 0.0 to –5.0 |
| 2015–2016             | 313        | 39.2 | 33.2 to 45.1 | 20.6            | 15.6 to 25.6 | 5.1              | 2.0 to 8.1  | 1.0               | 0.0 to 0.1  |
| <i>P</i> <sup>a</sup> |            | .852 |              | .792            |              | .775             |             | .286              |             |
| <i>P</i> <sup>b</sup> |            | .089 |              | .049            |              | .732             |             | .150              |             |
| <b>Age 16–19</b>      |            |      |              |                 |              |                  |             |                   |             |

TABLE 6 Continued

|                       | <i>n</i> | Overweight |              | Class I Obesity |              | Class II Obesity |              | Class III Obesity |             |
|-----------------------|----------|------------|--------------|-----------------|--------------|------------------|--------------|-------------------|-------------|
|                       |          | %          | 95% CI       | %               | 95% CI       | %                | 95% CI       | %                 | 95% CI      |
| 1999–2000             | 543      | 28.6       | 22.9 to 34.4 | 15.4            | 11.3 to 19.4 | 5.0              | 2.7 to 7.4   | 2.1               | 0.8 to 3.4  |
| 2001–2002             | 544      | 29.3       | 24.8 to 33.8 | 14.3            | 9.3 to 19.4  | 6.2              | 2.8 to 9.7   | 2.2               | 0.6 to 3.8  |
| 2003–2004             | 542      | 31.1       | 25.3 to 37.0 | 17.4            | 12.8 to 22.0 | 7.8              | 3.7 to 11.9  | 4.0               | 0.6 to 7.5  |
| 2005–2006             | 564      | 33.5       | 29.5 to 37.4 | 15.6            | 10.7 to 20.5 | 7.4              | 3.5 to 11.3  | 3.4               | 0.5 to 6.2  |
| 2007–2008             | 268      | 27.0       | 20.1 to 33.9 | 15.6            | 9.7 to 21.5  | 5.0              | 2.5 to 7.5   | 2.2               | –0.4 to 4.7 |
| 2009–2010             | 286      | 32.3       | 28.0 to 36.7 | 17.8            | 13.6 to 22.0 | 9.7              | 6.3 to 13.2  | 3.4               | 0.3 to 6.4  |
| 2011–2012             | 292      | 32.8       | 21.9 to 43.7 | 17.4            | 10.3 to 24.5 | 7.4              | 2.4 to 12.3  | 4.2               | –0.5 to 8.9 |
| 2013–2014             | 340      | 35.6       | 28.4 to 42.8 | 20.8            | 15.8 to 25.8 | 15.1             | 10.5 to 19.6 | 7.5               | 4.7 to 10.3 |
| 2015–2016             | 294      | 47.9       | 39.3 to 56.5 | 21.1            | 14.8 to 27.3 | 9.1              | 4.3 to 13.9  | 5.2               | 1.4 to 9.0  |
| <i>p</i> <sup>a</sup> |          | .032       |              | .944            |              | .076             |              | .349              |             |
| <i>p</i> <sup>b</sup> |          | <.001      |              | .035            |              | .007             |              | .013              |             |

<sup>a</sup> *P* value from an adjusted Wald test comparing the 2013–2014 cycle to the 2015–2016 cycle.

<sup>b</sup> *P* value from the linear trend across 1999–2016.

**SUPPLEMENTAL TABLE 7** Prevalence of Overweight and Obesity From 1999 to 2016 by Age for Males

|                       | Overweight |      |              | Class I Obesity |              | Class II Obesity |             | Class III Obesity |             |
|-----------------------|------------|------|--------------|-----------------|--------------|------------------|-------------|-------------------|-------------|
|                       | <i>n</i>   | %    | 95% CI       | %               | 95% CI       | %                | 95% CI      | %                 | 95% CI      |
| <b>All ages</b>       |            |      |              |                 |              |                  |             |                   |             |
| 1999–2000             | 2071       | 30.1 | 25.1 to 35.0 | 14.7            | 12.5 to 16.8 | 4.1              | 2.6 to 5.6  | 1.0               | 0.6 to 1.4  |
| 2001–2002             | 2126       | 30.3 | 27.9 to 32.8 | 16.2            | 14.1 to 18.3 | 6.2              | 4.5 to 7.9  | 1.5               | 0.8 to 2.2  |
| 2003–2004             | 2004       | 34.6 | 30.4 to 38.8 | 18.1            | 15.2 to 20.9 | 5.4              | 3.8 to 6.9  | 1.6               | 1.0 to 2.3  |
| 2005–2006             | 2114       | 30.6 | 27.0 to 34.1 | 16.2            | 13.2 to 19.2 | 5.1              | 3.4 to 6.8  | 1.3               | 0.7 to 2.0  |
| 2007–2008             | 1725       | 32.1 | 28.9 to 35.4 | 17.9            | 15.1 to 20.8 | 5.5              | 4.0 to 7.1  | 1.6               | 1.1 to 2.2  |
| 2009–2010             | 1777       | 33.3 | 30.9 to 35.7 | 19.0            | 16.9 to 21.0 | 6.5              | 4.6 to 8.4  | 1.7               | 0.9 to 2.5  |
| 2011–2012             | 1713       | 32.2 | 29.5 to 34.9 | 16.7            | 14.0 to 19.4 | 5.8              | 4.0 to 7.5  | 2.0               | 1.3 to 2.7  |
| 2013–2014             | 1794       | 33.7 | 31.3 to 36.1 | 17.5            | 15.0 to 19.9 | 5.7              | 4.6 to 6.8  | 2.1               | 1.4 to 2.8  |
| 2015–2016             | 1696       | 34.8 | 31.3 to 38.2 | 19.1            | 15.8 to 22.5 | 6.7              | 4.6 to 8.7  | 2.0               | 1.0 to 3.1  |
| <i>p</i> <sup>a</sup> |            | .615 |              | .424            |              | .436             |             | .932              |             |
| <i>p</i> <sup>b</sup> |            | .062 |              | .046            |              | .108             |             | .020              |             |
| <b>Age 2–5</b>        |            |      |              |                 |              |                  |             |                   |             |
| 1999–000              | 374        | 22.0 | 15.2 to 28.8 | 10.3            | 5.9 to 14.7  | 1.4              | 0.2 to 2.5  | 0.4               | −0.2 to 0.9 |
| 2001–2002             | 383        | 23.2 | 17.7 to 28.8 | 10.4            | 5.7 to 15.1  | 2.8              | −0.2 to 5.9 | 0.9               | −0.7 to 2.6 |
| 2003–2004             | 402        | 26.4 | 20.9 to 31.9 | 14.6            | 11.5 to 17.8 | 3.9              | 1.6 to 6.1  | 1.3               | −0.4 to 2.9 |
| 2005–2006             | 473        | 23.4 | 17.8 to 29.1 | 10.4            | 6.9 to 13.8  | 1.6              | 0.6 to 2.6  | 0.4               | −0.2 to 1.0 |
| 2007–2008             | 489        | 20.6 | 16.1 to 25.2 | 9.8             | 7.0 to 12.6  | 1.4              | 0.6 to 2.3  | 0.4               | 0.1 to 0.6  |
| 2009–2010             | 471        | 29.4 | 23.6 to 35.1 | 14.3            | 10.8 to 17.8 | 3.6              | 2.4 to 4.9  | 0.3               | −0.1 to 0.7 |
| 2011–2012             | 439        | 23.6 | 19.7 to 27.5 | 9.3             | 5.6 to 13.1  | 1.8              | 0.7 to 2.9  | 0.6               | −0.1 to 1.3 |
| 2013–2014             | 428        | 25.5 | 21.5 to 29.5 | 8.5             | 4.5 to 12.6  | 0.6              | 0.2 to 1.0  | 0.2               | −0.2 to 0.6 |
| 2015–2016             | 418        | 26.0 | 21.0 to 31.0 | 14.2            | 11.8 to 16.5 | 2.0              | 0.5 to 3.5  | 0.3               | −0.2 to 0.8 |
| <i>p</i> <sup>a</sup> |            | .863 |              | .018            |              | .075             |             | .624              |             |
| <i>p</i> <sup>b</sup> |            | .281 |              | .868            |              | .341             |             | .258              |             |
| <b>Age 6–8</b>        |            |      |              |                 |              |                  |             |                   |             |
| 1999–2000             | 293        | 33.1 | 25.5 to 40.8 | 15.8            | 12.5 to 19.0 | 3.2              | 0.9 to 5.5  | 0.4               | −0.1 to 0.9 |
| 2001–2002             | 287        | 33.8 | 25.8 to 41.8 | 18.4            | 12.8 to 24.1 | 8.7              | 2.5 to 15.0 | 1.9               | 0.1 to 3.7  |
| 2003–2004             | 229        | 33.1 | 27.3 to 38.9 | 17.8            | 11.9 to 23.7 | 3.3              | 0.7 to 5.8  | 1.4               | −0.2 to 3.1 |
| 2005–2006             | 279        | 28.2 | 21.2 to 35.2 | 13.7            | 7.4 to 19.9  | 3.6              | 1.2 to 5.9  | 1.3               | 0.3 to 2.2  |
| 2007–2008             | 303        | 32.9 | 28.2 to 37.5 | 20.3            | 16.5 to 24.0 | 6.4              | 2.8 to 10.1 | 1.3               | −0.7 to 3.4 |
| 2009–2010             | 315        | 29.2 | 25.4 to 33.1 | 17.6            | 14.4 to 20.9 | 4.4              | 3.0 to 5.7  | 1.1               | 0.1 to 2.1  |
| 2011–2012             | 350        | 29.6 | 21.3 to 37.9 | 14.5            | 10.4 to 18.5 | 6.5              | 4.1 to 9.0  | 3.0               | 1.2 to 4.8  |
| 2013–2014             | 354        | 31.5 | 26.7 to 36.4 | 17.9            | 12.6 to 23.2 | 3.3              | 1.5 to 5.0  | 0.6               | −0.1 to 1.2 |
| 2015–2016             | 334        | 31.6 | 26.7 to 36.4 | 18.2            | 12.1 to 24.2 | 5.3              | 3.1 to 7.5  | 1.1               | −0.2 to 2.3 |
| <i>p</i> <sup>a</sup> |            | .987 |              | .941            |              | .155             |             | .461              |             |
| <i>p</i> <sup>b</sup> |            | .458 |              | .798            |              | .990             |             | .673              |             |
| <b>Age 9–11</b>       |            |      |              |                 |              |                  |             |                   |             |
| 1999–2000             | 249        | 33.0 | 23.8 to 42.2 | 16.3            | 11.2 to 21.4 | 3.5              | 0.4 to 6.5  | 0.7               | −0.2 to 1.5 |
| 2001–2002             | 294        | 30.8 | 24.7 to 36.9 | 16.2            | 11.3 to 21.1 | 7.3              | 4.3 to 10.2 | 2.1               | 0.3 to 3.9  |
| 2003–2004             | 234        | 40.3 | 31.2 to 49.3 | 22.1            | 13.8 to 30.5 | 7.2              | 3.4 to 10.9 | 1.6               | 0.5 to 2.7  |
| 2005–2006             | 271        | 34.6 | 28.1 to 41.0 | 19.6            | 14.7 to 24.4 | 5.0              | 2.1 to 7.9  | 0.8               | 0.0 to 1.5  |
| 2007–2008             | 292        | 39.1 | 31.7 to 46.5 | 22.4            | 17.1 to 27.7 | 6.3              | 3.5 to 9.0  | 1.3               | 0.3 to 2.3  |
| 2009–2010             | 306        | 38.4 | 34.3 to 42.4 | 23.3            | 18.3 to 28.2 | 7.2              | 4.0 to 10.4 | 1.1               | 0.1 to 2.1  |
| 2011–2012             | 300        | 37.9 | 29.5 to 46.2 | 18.8            | 13.1 to 24.5 | 8.1              | 4.3 to 11.9 | 1.3               | 0.1 to 2.5  |
| 2013–2014             | 311        | 37.3 | 28.4 to 46.1 | 21.6            | 14.3 to 28.9 | 5.9              | 2.4 to 9.3  | 2.2               | 0.0 to 4.3  |
| 2015–2016             | 293        | 43.8 | 38.0 to 49.7 | 23.3            | 18.3 to 28.3 | 5.2              | 2.3 to 8.2  | 1.2               | 0.2 to 2.2  |
| <i>p</i> <sup>a</sup> |            | .223 |              | .700            |              | .774             |             | .417              |             |
| <i>p</i> <sup>b</sup> |            | .036 |              | .068            |              | .702             |             | .779              |             |
| <b>Age 12–15</b>      |            |      |              |                 |              |                  |             |                   |             |
| 1999–2000             | 593        | 30.7 | 26.7 to 34.7 | 16.7            | 14.0 to 19.4 | 5.4              | 2.7 to 8.1  | 1.5               | 0.1 to 2.9  |
| 2001–2002             | 552        | 30.6 | 22.3 to 38.9 | 16.7            | 12.6 to 20.8 | 6.2              | 3.8 to 8.7  | 0.6               | 0.2 to 1.1  |
| 2003–2004             | 562        | 37.2 | 28.8 to 45.6 | 17.4            | 12.3 to 22.5 | 5.6              | 3.2 to 8.0  | 2.2               | 1.0 to 3.5  |
| 2005–2006             | 527        | 32.5 | 26.7 to 38.3 | 16.7            | 10.9 to 22.5 | 6.2              | 3.2 to 9.3  | 1.5               | 0.2 to 2.7  |
| 2007–2008             | 318        | 36.3 | 28.7 to 43.8 | 20.8            | 14.2 to 27.3 | 6.3              | 3.7 to 8.9  | 1.9               | 0.6 to 3.2  |
| 2009–2010             | 324        | 34.0 | 27.0 to 40.9 | 18.5            | 12.8 to 24.2 | 9.3              | 4.1 to 14.5 | 3.2               | 0.6 to 5.8  |
| 2011–2012             | 323        | 38.3 | 30.9 to 45.8 | 22.9            | 17.5 to 28.4 | 6.4              | 1.9 to 10.9 | 1.9               | 0.4 to 3.5  |
| 2013–2014             | 373        | 36.2 | 30.0 to 42.4 | 18.3            | 14.0 to 22.5 | 7.8              | 5.1 to 10.4 | 3.4               | 1.3 to 5.5  |
| 2015–2016             | 362        | 38.2 | 31.9 to 44.6 | 20.6            | 14.2 to 26.9 | 9.7              | 5.2 to 14.2 | 3.2               | 1.0 to 5.3  |
| <i>p</i> <sup>a</sup> |            | .643 |              | .554            |              | .464             |             | .880              |             |
| <i>p</i> <sup>b</sup> |            | .052 |              | .090            |              | .048             |             | .020              |             |
| <b>Age 16–19</b>      |            |      |              |                 |              |                  |             |                   |             |

TABLE 7 Continued

|                       | <i>n</i> | Overweight |              | Class I Obesity |              | Class II Obesity |             | Class III Obesity |            |
|-----------------------|----------|------------|--------------|-----------------|--------------|------------------|-------------|-------------------|------------|
|                       |          | %          | 95% CI       | %               | 95% CI       | %                | 95% CI      | %                 | 95% CI     |
| 1999–2000             | 562      | 32.2       | 25.4 to 39.1 | 14.5            | 11.0 to 18.0 | 6.6              | 2.9 to 10.4 | 1.8               | 0.6 to 3.0 |
| 2001–2002             | 610      | 32.5       | 29.0 to 36.1 | 18.6            | 14.0 to 23.2 | 5.9              | 3.5 to 8.4  | 2.0               | 0.4 to 3.5 |
| 2003–2004             | 577      | 36.3       | 31.7 to 41.0 | 19.2            | 13.6 to 24.7 | 6.9              | 2.6 to 11.1 | 1.5               | 0.2 to 2.9 |
| 2005–2006             | 564      | 33.7       | 26.3 to 41.1 | 20.4            | 13.2 to 27.7 | 8.3              | 4.4 to 12.1 | 2.5               | 0.9 to 4.1 |
| 2007–2008             | 323      | 34.2       | 28.8 to 39.6 | 18.4            | 12.7 to 24.2 | 7.6              | 3.0 to 12.3 | 3.1               | 1.3 to 4.9 |
| 2009–2010             | 361      | 36.0       | 30.8 to 41.3 | 22.0            | 16.4 to 27.6 | 7.7              | 3.2 to 12.2 | 2.6               | 1.1 to 4.1 |
| 2011–2012             | 301      | 32.8       | 25.3 to 40.2 | 17.9            | 10.0 to 25.7 | 6.7              | 4.3 to 9.1  | 3.2               | 2.2 to 4.2 |
| 2013–2014             | 328      | 37.8       | 29.5 to 46.0 | 21.6            | 14.3 to 28.8 | 10.0             | 5.8 to 14.3 | 3.6               | 1.5 to 5.6 |
| 2015–2016             | 289      | 34.8       | 27.5 to 42.1 | 19.9            | 13.1 to 26.8 | 9.8              | 5.9 to 13.7 | 3.8               | 1.6 to 6.1 |
| <i>p</i> <sup>a</sup> |          | .599       |              | .744            |              | .945             |             | .873              |            |
| <i>p</i> <sup>b</sup> |          | .410       |              | .410            |              | .090             |             | .017              |            |

<sup>a</sup> *P* value from an adjusted Wald test comparing the 2013–2014 cycle to the 2015–2016 cycle.

<sup>b</sup> *P* value from the linear trend across 1999–2016.

**SUPPLEMENTAL TABLE 8** Prevalence of Overweight and Obesity Among Females From 1999 to 2016 by Race

|                          | White |              | African American |              | Hispanic |              | Other, Including Asian American |              | Asian American |              | Other Non-Asian American |              |
|--------------------------|-------|--------------|------------------|--------------|----------|--------------|---------------------------------|--------------|----------------|--------------|--------------------------|--------------|
|                          | %     | 95% CI       | %                | 95% CI       | %        | 95% CI       | %                               | 95% CI       | %              | 95% CI       | %                        | 95% CI       |
| <b>Overweight</b>        |       |              |                  |              |          |              |                                 |              |                |              |                          |              |
| 1999–2000                | 23.1  | 19.8 to 26.3 | 37.8             | 33.9 to 41.7 | 31.7     | 26.6 to 36.9 | 28.5                            | 13.0 to 44.0 | —              | —            | —                        | —            |
| 2001–2002                | 26.5  | 22.1 to 30.9 | 37.0             | 33.6 to 40.3 | 35.4     | 31.5 to 39.2 | 23.7                            | 12.4 to 35.1 | —              | —            | —                        | —            |
| 2003–2004                | 31.9  | 26.7 to 37.0 | 40.7             | 37.1 to 44.4 | 34.7     | 29.3 to 40.2 | 18.4                            | 6.8 to 29.9  | —              | —            | —                        | —            |
| 2005–2006                | 27.4  | 22.6 to 32.2 | 38.7             | 36.0 to 41.4 | 35.6     | 31.0 to 40.2 | 16.0                            | 7.3 to 24.8  | —              | —            | —                        | —            |
| 2007–2008                | 29.2  | 23.4 to 35.0 | 39.1             | 34.5 to 43.7 | 36.2     | 31.7 to 40.7 | 16.9                            | 10.2 to 23.6 | —              | —            | —                        | —            |
| 2009–2010                | 25.6  | 23.0 to 28.2 | 41.0             | 36.8 to 45.1 | 38.7     | 35.3 to 42.0 | 23.7                            | 13.3 to 34.2 | —              | —            | —                        | —            |
| 2011–2012                | 29.2  | 22.7 to 35.6 | 36.1             | 28.8 to 43.4 | 37.5     | 34.4 to 40.5 | —                               | —            | 13.7           | 7.8 to 19.6  | 37.7                     | 22.8 to 52.6 |
| 2013–2014                | 27.5  | 22.6 to 32.4 | 41.1             | 35.4 to 46.8 | 42.6     | 38.6 to 46.5 | —                               | —            | 16.7           | 11.4 to 22.1 | 39.9                     | 21.5 to 58.4 |
| 2015–2016                | 29.5  | 24.6 to 34.5 | 43.7             | 35.7 to 51.8 | 45.5     | 41.9 to 49.0 | —                               | —            | 22.5           | 13.1 to 32.0 | 38.4                     | 25.6 to 51.2 |
| <i>P</i> <sup>a</sup>    | .575  |              | .601             |              | .284     |              | —                               | —            | .286           |              | .891                     |              |
| <i>P</i> <sup>b</sup>    | .282  |              | .211             |              | <.001    |              | .487                            |              | .118           |              | .964                     |              |
| <b>Class I Obesity</b>   |       |              |                  |              |          |              |                                 |              |                |              |                          |              |
| 1999–2000                | 12.0  | 8.1 to 15.8  | 21.5             | 19.0 to 24.0 | 15.4     | 11.8 to 18.9 | 18.4                            | 7.8 to 29.0  | —              | —            | —                        | —            |
| 2001–2002                | 12.6  | 8.9 to 16.3  | 19.7             | 17.1 to 22.2 | 17.3     | 14.0 to 20.6 | 8.3                             | 0.5 to 16.0  | —              | —            | —                        | —            |
| 2003–2004                | 14.8  | 11.0 to 18.6 | 24.0             | 21.3 to 26.7 | 17.1     | 12.3 to 22.0 | 6.2                             | 2.2 to 10.2  | —              | —            | —                        | —            |
| 2005–2006                | 12.5  | 8.3 to 16.7  | 24.4             | 20.2 to 28.7 | 20.8     | 17.5 to 24.1 | 5.6                             | 2.2 to 9.0   | —              | —            | —                        | —            |
| 2007–2008                | 14.9  | 10.0 to 19.8 | 23.1             | 18.2 to 27.9 | 17.2     | 13.9 to 20.6 | 4.9                             | 1.4 to 8.5   | —              | —            | —                        | —            |
| 2009–2010                | 11.7  | 9.5 to 13.8  | 24.3             | 19.3 to 29.4 | 19.0     | 15.6 to 22.4 | 11.6                            | 4.6 to 18.5  | —              | —            | —                        | —            |
| 2011–2012                | 15.6  | 11.4 to 19.8 | 20.7             | 14.4 to 26.9 | 20.6     | 17.6 to 23.6 | —                               | —            | 5.6            | 0.7 to 10.4  | 19.7                     | 6.9 to 32.4  |
| 2013–2014                | 14.8  | 9.3 to 20.3  | 20.9             | 17.8 to 24.0 | 22.1     | 18.0 to 26.2 | —                               | —            | 5.0            | 2.9 to 7.0   | 19.4                     | 10.728.0     |
| 2015–2016                | 13.6  | 10.7 to 16.4 | 25.1             | 16.8 to 33.4 | 23.5     | 20.0 to 27.0 | —                               | —            | 10.1           | 5.6 to 14.5  | 20.9                     | 10.431.5     |
| <i>P</i> <sup>a</sup>    | .690  |              | .349             |              | .600     |              | —                               | —            | .042           |              | .820                     |              |
| <i>P</i> <sup>b</sup>    | .382  |              | .620             |              | <.001    |              | .336                            |              | .175           |              | .866                     |              |
| <b>Class II Obesity</b>  |       |              |                  |              |          |              |                                 |              |                |              |                          |              |
| 1999–2000                | 3.0   | 1.6 to 4.5   | 7.9              | 5.4 to 10.3  | 3.5      | 2.2 to 4.7   | 4.9                             | 0.1 to 9.8   | —              | —            | —                        | —            |
| 2001–2002                | 3.3   | 1.8 to 4.8   | 7.7              | 5.7 to 9.7   | 7.1      | 4.3 to 9.9   | 1.9                             | –1.6 to 5.4  | —              | —            | —                        | —            |
| 2003–2004                | 4.1   | 1.9 to 6.3   | 10.3             | 8.4 to 12.3  | 5.4      | 2.9 to 7.9   | 0.9                             | –0.2 to 1.9  | —              | —            | —                        | —            |
| 2005–2006                | 3.5   | 1.8 to 5.2   | 10.9             | 7.5 to 14.4  | 6.6      | 4.5 to 8.7   | 1.2                             | 0.3 to 2.1   | —              | —            | —                        | —            |
| 2007–2008                | 3.7   | 1.6 to 5.8   | 8.2              | 6.5 to 10.0  | 5.9      | 4.3 to 7.5   | 0.7                             | –0.7 to 2.2  | —              | —            | —                        | —            |
| 2009–2010                | 4.4   | 2.1 to 6.8   | 9.5              | 6.4 to 12.5  | 5.4      | 3.1 to 7.8   | 1.9                             | –0.8 to 4.5  | —              | —            | —                        | —            |
| 2011–2012                | 4.7   | 2.5 to 6.8   | 10.2             | 5.3 to 15.0  | 7.0      | 4.5 to 9.4   | —                               | —            | 1.0            | –0.4 to 2.5  | 6.5                      | –0.4 to 13.4 |
| 2013–2014                | 6.0   | 3.1 to 8.9   | 8.6              | 5.7 to 11.5  | 8.9      | 6.0 to 11.8  | —                               | —            | 0.4            | –0.4 to 1.2  | 4.4                      | –0.4 to 9.1  |
| 2015–2016                | 3.8   | 2.1 to 5.6   | 9.5              | 5.0 to 13.9  | 6.3      | 4.3 to 8.2   | —                               | —            | 1.2            | –1.0 to 3.5  | 6.5                      | 1.1 to 11.9  |
| <i>P</i> <sup>a</sup>    | .200  |              | .754             |              | .142     |              | —                               | —            | .489           |              | .554                     |              |
| <i>P</i> <sup>b</sup>    | .087  |              | .596             |              | .037     |              | .279                            |              | .890           |              | .945                     |              |
| <b>Class III Obesity</b> |       |              |                  |              |          |              |                                 |              |                |              |                          |              |
| 1999–2000                | 0.4   | –0.1 to 0.9  | 2.8              | 1.6 to 4.1   | 1.0      | 0.3 to 1.8   | 0.6                             | –0.2 to 1.5  | —              | —            | —                        | —            |
| 2001–2002                | 0.5   | –0.1 to 1.0  | 2.5              | 1.4 to 3.6   | 1.9      | 0.7 to 3.1   | 0.0                             | —            | —              | —            | —                        | —            |
| 2003–2004                | 1.0   | –0.2 to 2.2  | 4.7              | 3.0 to 6.3   | 1.4      | 0.3 to 2.4   | 0.0                             | —            | —              | —            | —                        | —            |
| 2005–2006                | 0.4   | –0.2 to 1.0  | 4.7              | 1.9 to 7.6   | 1.3      | –0.2 to 2.8  | 0.0                             | —            | —              | —            | —                        | —            |



TABLE 8 Continued

|                       | White |            | African American |            | Hispanic |             | Other, Including Asian American |        | Asian American |        | Other Non-Asian American |             |
|-----------------------|-------|------------|------------------|------------|----------|-------------|---------------------------------|--------|----------------|--------|--------------------------|-------------|
|                       | %     | 95% CI     | %                | 95% CI     | %        | 95% CI      | %                               | 95% CI | %              | 95% CI | %                        | 95% CI      |
| 2007–2008             | 1.6   | 0.1 to 3.0 | 2.6              | 1.1 to 4.1 | 1.4      | 0.3 to 2.5  | 0.0                             | 0.0    | —              | —      | —                        | —           |
| 2009–2010             | 1.0   | 0.1 to 1.8 | 4.5              | 2.9 to 6.1 | 1.7      | 0.6 to 2.8  | 0.0                             | 0.0    | —              | —      | —                        | —           |
| 2011–2012             | 2.5   | 0.3 to 4.7 | 5.4              | 1.7 to 9.0 | 0.5      | –0.1 to 1.0 | —                               | —      | 0.0            | 0.0    | 0.0                      | 0.0         |
| 2013–2014             | 2.7   | 1.2 to 4.2 | 3.9              | 2.0 to 5.8 | 2.0      | 1.0 to 3.0  | —                               | —      | 0.0            | 0.0    | 2.1                      | –0.8 to 5.0 |
| 2015–2016             | 1.2   | 0.0 to 2.4 | 3.6              | 1.5 to 5.6 | 2.6      | 1.2 to 3.9  | —                               | —      | 0.0            | 0.0    | 1.3                      | –0.6 to 3.2 |
| <i>P</i> <sup>a</sup> | .139  |            | .808             |            | .537     |             | —                               | —      | —              | —      | .650                     |             |
| <i>P</i> <sup>b</sup> | .003  |            | .263             |            | .215     |             | .155                            |        | —              | —      | .311                     |             |

—, not applicable.

<sup>a</sup> *P* value from an adjusted Wald test comparing the 2013–2014 cycle to the 2015–2016 cycle.<sup>b</sup> *P* value from the linear trend across 1999–2016.

**SUPPLEMENTAL TABLE 9** Prevalence of Overweight and Obesity Among Boys From 1999 to 2016 by Race

|                          | White |              |       | African American |       |              | Hispanic |              |       | Other, Including Asian American |       |        | Asian American |        |       | Other Non-Asian American |   |        |   |
|--------------------------|-------|--------------|-------|------------------|-------|--------------|----------|--------------|-------|---------------------------------|-------|--------|----------------|--------|-------|--------------------------|---|--------|---|
|                          | %     | 95% CI       | %     | 95% CI           | %     | 95% CI       | %        | 95% CI       | %     | 95% CI                          | %     | 95% CI | %              | 95% CI | %     | 95% CI                   | % | 95% CI |   |
| <b>Overweight</b>        |       |              |       |                  |       |              |          |              |       |                                 |       |        |                |        |       |                          |   |        |   |
| 1999–2000                | 27.5  | 19.1 to 35.9 | 30.9  | 27.1 to 34.8     | 37.4  | 32.6 to 42.2 | 25.5     | 14.6 to 36.3 | —     | —                               | —     | —      | —              | —      | —     | —                        | — | —      | — |
| 2001–2002                | 28.2  | 23.9 to 32.5 | 27.5  | 24.8 to 30.2     | 38.8  | 33.6 to 44.1 | 35.6     | 25.8 to 45.3 | —     | —                               | —     | —      | —              | —      | —     | —                        | — | —      | — |
| 2003–2004                | 35.2  | 29.7 to 40.7 | 30.7  | 25.5 to 36.0     | 40.4  | 35.3 to 45.5 | 22.8     | 11.9 to 33.6 | —     | —                               | —     | —      | —              | —      | —     | —                        | — | —      | — |
| 2005–2006                | 28.2  | 23.3 to 33.2 | 31.1  | 27.7 to 34.5     | 40.1  | 35.8 to 44.3 | 26.2     | 17.9 to 34.5 | —     | —                               | —     | —      | —              | —      | —     | —                        | — | —      | — |
| 2007–2008                | 30.6  | 24.9 to 34.3 | 33.4  | 27.6 to 39.3     | 39.7  | 35.1 to 44.3 | 29.0     | 20.7 to 37.4 | —     | —                               | —     | —      | —              | —      | —     | —                        | — | —      | — |
| 2009–2010                | 39.5  | 26.5 to 34.4 | 37.3  | 31.7 to 42.9     | 39.8  | 36.1 to 43.4 | 29.4     | 22.6 to 36.2 | —     | —                               | —     | —      | —              | —      | —     | —                        | — | —      | — |
| 2011–2012                | 28.1  | 23.1 to 33.2 | 34.2  | 30.5 to 37.9     | 40.7  | 37.8 to 43.6 | —        | —            | 25.1  | 18.4 to 31.8                    | —     | —      | —              | —      | 38.7  | 27.7 to 49.7             | — | —      | — |
| 2013–2014                | 31.5  | 26.8 to 36.2 | 33.1  | 29.6 to 36.6     | 41.3  | 36.9 to 45.6 | —        | —            | 24.6  | 16.1 to 33.2                    | —     | —      | —              | —      | 31.3  | 17.6 to 44.9             | — | —      | — |
| 2015–2016                | 30.2  | 27.0 to 33.3 | 32.0  | 27.7 to 36.2     | 46.3  | 41.3 to 51.3 | —        | —            | 23.9  | 18.4 to 29.3                    | —     | —      | —              | —      | 44.6  | 35.0 to 54.1             | — | —      | — |
| <i>P</i> <sup>a</sup>    | 0.642 |              | 0.676 |                  | 0.133 |              | —        | —            | 0.880 |                                 | 0.880 |        | —              | —      | 0.113 |                          | — | —      | — |
| <i>P</i> <sup>b</sup>    | 0.714 |              | 0.017 |                  | 0.021 |              | 0.935    |              | 0.772 |                                 | 0.772 |        | —              | —      | 0.324 |                          | — | —      | — |
| <b>Class I Obesity</b>   |       |              |       |                  |       |              |          |              |       |                                 |       |        |                |        |       |                          |   |        |   |
| 1999–2000                | 11.0  | 7.9 to 14.0  | 16.5  | 14.1 to 18.9     | 22.9  | 18.1 to 27.8 | 14.6     | 5.6 to 23.5  | —     | —                               | —     | —      | —              | —      | —     | —                        | — | —      | — |
| 2001–2002                | 15.0  | 12.0 to 18.0 | 15.6  | 12.7 to 18.6     | 20.6  | 16.4 to 24.9 | 18.1     | 7.0 to 29.2  | —     | —                               | —     | —      | —              | —      | —     | —                        | — | —      | — |
| 2003–2004                | 17.6  | 13.2 to 22.0 | 16.4  | 13.5 to 19.3     | 21.5  | 16.0 to 27.1 | 16.9     | 12.4 to 21.5 | —     | —                               | —     | —      | —              | —      | —     | —                        | — | —      | — |
| 2005–2006                | 13.8  | 10.1 to 17.6 | 18.3  | 15.7 to 20.9     | 25.0  | 20.8 to 29.2 | 11.1     | 5.0 to 17.3  | —     | —                               | —     | —      | —              | —      | —     | —                        | — | —      | — |
| 2007–2008                | 15.9  | 12.2 to 19.7 | 17.5  | 13.2 to 21.9     | 24.2  | 20.9 to 27.6 | 17.7     | 11.3 to 24.1 | —     | —                               | —     | —      | —              | —      | —     | —                        | — | —      | — |
| 2009–2010                | 16.6  | 13.1 to 20.1 | 24.3  | 18.6 to 29.9     | 23.6  | 20.7 to 26.5 | 14.2     | 8.5 to 19.9  | —     | —                               | —     | —      | —              | —      | —     | —                        | — | —      | — |
| 2011–2012                | 12.6  | 7.9 to 17.3  | 20.4  | 18.1 to 22.6     | 23.9  | 21.1 to 26.7 | —        | —            | 11.5  | 7.2 to 15.7                     | —     | —      | —              | —      | 21.6  | 12.1 to 31.1             | — | —      | — |
| 2013–2014                | 16.2  | 12.3 to 20.1 | 16.8  | 12.9 to 20.6     | 21.2  | 17.0 to 25.4 | —        | —            | 11.3  | 5.7 to 16.9                     | —     | —      | —              | —      | 21.0  | 6.8 to 35.2              | — | —      | — |
| 2015–2016                | 14.7  | 11.5 to 17.8 | 19.3  | 14.1 to 24.5     | 28.0  | 22.3 to 33.6 | —        | —            | 11.2  | 6.6 to 15.9                     | —     | —      | —              | —      | 29.7  | 12.3 to 47.1             | — | —      | — |
| <i>P</i> <sup>a</sup>    | 0.544 |              | 0.443 |                  | 0.059 |              | 0.756    |              | 0.979 |                                 | 0.979 |        | —              | —      | 0.439 |                          | — | —      | — |
| <i>P</i> <sup>b</sup>    | 0.472 |              | 0.041 |                  | 0.208 |              | —        | —            | 0.933 |                                 | 0.933 |        | —              | —      | 0.400 |                          | — | —      | — |
| <b>Class II Obesity</b>  |       |              |       |                  |       |              |          |              |       |                                 |       |        |                |        |       |                          |   |        |   |
| 1999–2000                | 2.8   | 0.9 to 4.7   | 6.4   | 4.4 to 8.3       | 5.5   | 3.4 to 7.6   | 5.4      | –2.7 to 13.5 | —     | —                               | —     | —      | —              | —      | —     | —                        | — | —      | — |
| 2001–2002                | 5.7   | 3.2 to 8.2   | 5.8   | 3.8 to 7.8       | 8.7   | 5.4 to 12.1  | 4.7      | 0.2 to 9.2   | —     | —                               | —     | —      | —              | —      | —     | —                        | — | —      | — |
| 2003–2004                | 4.6   | 2.5 to 6.8   | 7.5   | 5.6 to 9.4       | 6.5   | 4.2 to 8.7   | 4.9      | 0.5 to 9.4   | —     | —                               | —     | —      | —              | —      | —     | —                        | — | —      | — |
| 2005–2006                | 3.5   | 1.6 to 5.4   | 7.9   | 5.7 to 10.2      | 9.0   | 6.1 to 11.8  | 3.6      | –0.8 to 7.9  | —     | —                               | —     | —      | —              | —      | —     | —                        | — | —      | — |
| 2007–2008                | 4.2   | 1.9 to 6.5   | 6.9   | 3.9 to 10.0      | 8.6   | 6.5 to 10.6  | 5.3      | –0.4 to 11.0 | —     | —                               | —     | —      | —              | —      | —     | —                        | — | —      | — |
| 2009–2010                | 4.9   | 1.7 to 8.1   | 12.0  | 8.0 to 16.1      | 8.1   | 6.4 to 9.8   | 4.2      | 0.0 to 8.4   | —     | —                               | —     | —      | —              | —      | —     | —                        | — | —      | — |
| 2011–2012                | 3.2   | 0.6 to 5.7   | 10.3  | 8.0 to 12.6      | 8.3   | 4.9 to 11.8  | —        | —            | 2.8   | 0.7 to 4.9                      | —     | —      | —              | —      | 11.6  | –2.8 to 26.1             | — | —      | — |
| 2013–2014                | 4.7   | 3.1 to 6.4   | 6.2   | 3.8 to 8.7       | 7.8   | 5.6 to 10.0  | —        | —            | 2.1   | –0.4 to 4.6                     | —     | —      | —              | —      | 8.8   | –1.1 to 18.7             | — | —      | — |
| 2015–2016                | 4.0   | 2.0 to 6.0   | 8.6   | 5.0 to 12.2      | 11.9  | 8.2 to 15.5  | —        | —            | 1.5   | 0.0 to 3.0                      | —     | —      | —              | —      | 8.8   | –3.7 to 21.3             | — | —      | — |
| <i>P</i> <sup>a</sup>    | 0.578 |              | 0.278 |                  | 0.062 |              | 0.821    |              | 0.981 |                                 | 0.981 |        | —              | —      | 0.988 |                          | — | —      | — |
| <i>P</i> <sup>b</sup>    | 0.927 |              | 0.046 |                  | 0.023 |              | —        | —            | 0.316 |                                 | 0.316 |        | —              | —      | 0.773 |                          | — | —      | — |
| <b>Class III Obesity</b> |       |              |       |                  |       |              |          |              |       |                                 |       |        |                |        |       |                          |   |        |   |
| 1999–2000                | 0.5   | –0.1 to 1.1  | 2.3   | 1.1 to 3.6       | 1.4   | 0.4 to 2.4   | 0.6      | –0.4 to 1.6  | —     | —                               | —     | —      | —              | —      | —     | —                        | — | —      | — |
| 2001–2002                | 1.2   | 0.3 to 2.1   | 2.0   | 0.6 to 3.3       | 2.2   | 1.0 to 3.4   | 1.7      | –1.7 to 5.0  | —     | —                               | —     | —      | —              | —      | —     | —                        | — | —      | — |
| 2003–2004                | 1.2   | 0.4 to 2.1   | 2.9   | 1.8 to 4.1       | 2.2   | 0.7 to 3.7   | 1.1      | –0.3 to 2.5  | —     | —                               | —     | —      | —              | —      | —     | —                        | — | —      | — |
| 2005–2006                | 0.7   | 0.1 to 1.4   | 3.3   | 1.5 to 5.0       | 2.3   | 1.2 to 3.4   | 0.0      | –1.6 to 5.6  | —     | —                               | —     | —      | —              | —      | —     | —                        | — | —      | — |
| 2007–2008                | 0.9   | 0.1 to 1.7   | 2.0   | 0.2 to 3.8       | 3.4   | 2.1 to 4.6   | 2.0      | –1.6 to 5.6  | —     | —                               | —     | —      | —              | —      | —     | —                        | — | —      | — |
| 2009–2010                | 1.2   | 0.1 to 2.3   | 4.8   | 2.1 to 7.5       | 1.9   | 0.8 to 2.9   | 0.0      | —            | —     | —                               | —     | —      | —              | —      | —     | —                        | — | —      | — |
| 2011–2012                | 0.9   | –0.3 to 2.1  | 3.5   | 1.7 to 5.2       | 3.2   | 1.4 to 4.9   | —        | —            | 0.8   | –0.9 to 2.4                     | —     | —      | —              | —      | 7.1   | –6.2 to 20.4             | — | —      | — |

**TABLE 9** Continued

|                       | White |            | African American |            | Hispanic |            | Other, Including Asian American |        | Asian American |             | Other Non-Asian American |              |
|-----------------------|-------|------------|------------------|------------|----------|------------|---------------------------------|--------|----------------|-------------|--------------------------|--------------|
|                       | %     | 95% CI     | %                | 95% CI     | %        | 95% CI     | %                               | 95% CI | %              | 95% CI      | %                        | 95% CI       |
| 2013–2014             | 1.7   | 0.7 to 2.7 | 2.7              | 0.7 to 4.7 | 2.1      | 0.9 to 3.3 | —                               | —      | 0.9            | –0.9 to 2.7 | 6.2                      | –2.3 to 14.7 |
| 2015–2016             | 1.0   | 0.1 to 2.0 | 4.1              | 1.6 to 6.6 | 4.0      | 1.8 to 6.2 | —                               | —      | 0.0            | —           | 0.0                      | —            |
| <i>P</i> <sup>a</sup> | 0.329 | —          | 0.390            | —          | 0.138    | —          | —                               | —      | 0.330          | —           | 0.149                    | —            |
| <i>P</i> <sup>b</sup> | 0.399 | —          | 0.107            | —          | 0.069    | —          | 0.613                           | —      | 0.346          | —           | 0.242                    | —            |

—, not applicable.

<sup>a</sup> *P* value from an adjusted Wald test comparing the 2013–2014 cycle to the 2015–2016 cycle.

<sup>b</sup> *P* value from the linear trend across 1999–2016.
